# Supplementary material
Source: PubMed Central journal article supplement (PMC3070557)
Supplement: mmc2.pdf [file mmc2.pdf]

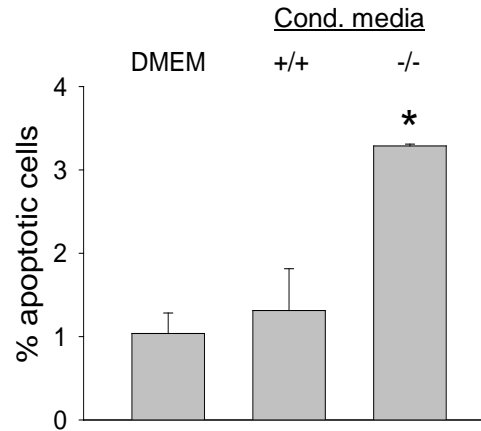

**Figure S2.** Conditionally immortalized endothelial cells derived from *PECAM-1<sup>-/-</sup>* mouse kidneys were grown to near confluence in complete media under permissive 31° C conditions, and then placed in serum-free DMEM (72 hr, 31° C). Cells were then washed with Hank's solution, and incubated with conditioned media from wild-type (+/+) or *Itgb8<sup>-/-</sup>* (-/-) MC for 8 hr, and then evaluated for apoptosis by annexin V labeling by two observers blinded to experimental conditions. \* P <0.01 compared to other groups.
