# Supplementary material
Source: PubMed Central journal article supplement (PMC3070557)
Supplement: mmc3.pdf [file mmc3.pdf]

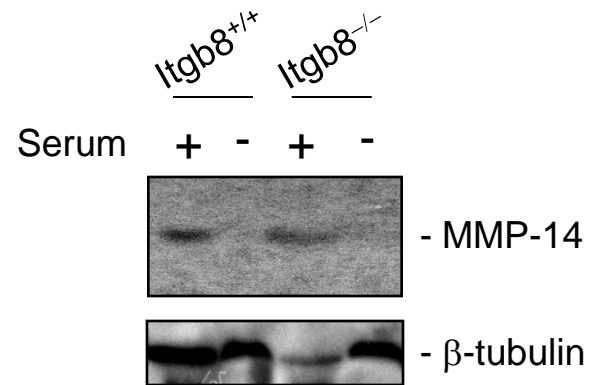

**Figure S3.** *Itgb8*<sup>+/+</sup> or *Itgb8*<sup>-/-</sup> MC were grown to near confluence in complete media. Wells were then washed and cells were maintained in serum-free media for 72 hrs. Immunoblots from cell lysates (40  $\mu$ g total protein) were probed for MMP-14 expression (upper panel). Blots were stripped and re-probed with anti-tubulin antibodies as a loading control (lower panel).
